# Supplementary material
Source: HighWire-hosted journal article supplement (http://ajnr-stage2.highwire.org/highwire/filestream/97088/field_highwire_adjunct_files/0/1079.pdf)
Supplement: 1079.pdf [file 1079.pdf]

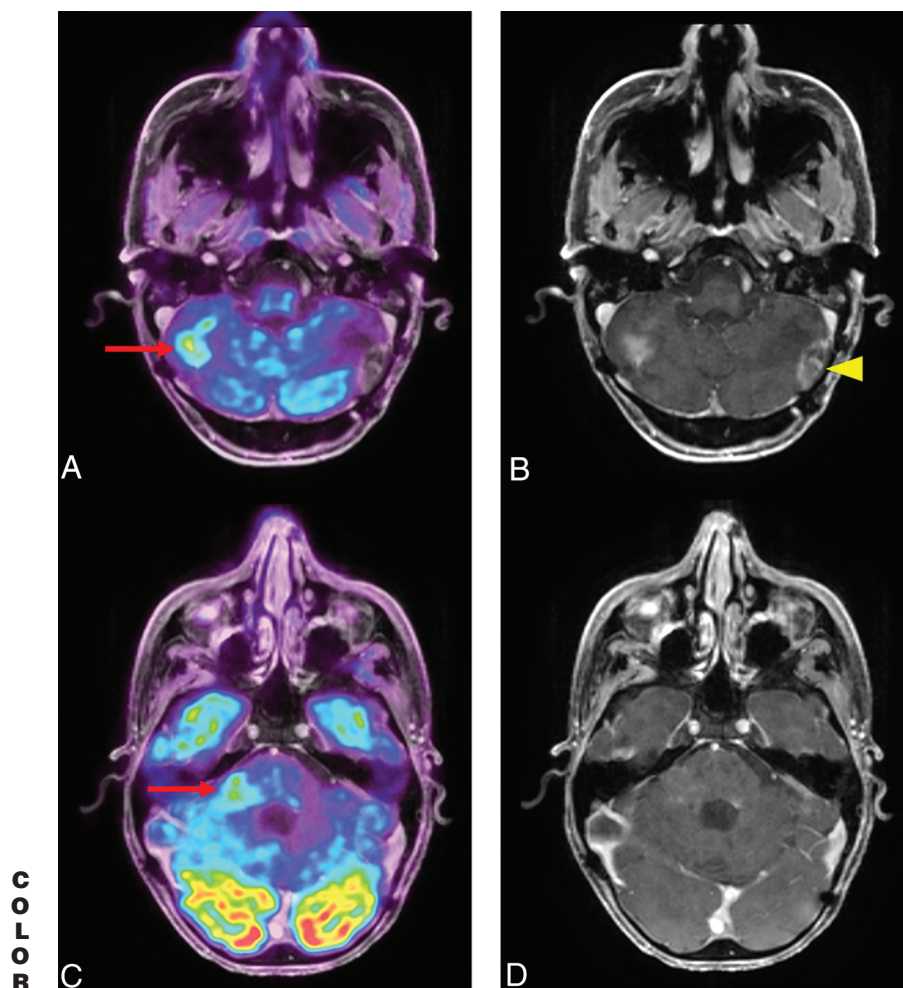

**SUPPLEMENTARY FIGURE 1.** Selected FDG PET/MR images from a study performed in a 19-year-old man with medulloblastoma diagnosed at 6 years of age and previously treated with resection, craniospinal radiation, and chemotherapy, now with suspected recurrence. Fused FDG PET/MR images of the posterior fossa are shown in *A* and *C*, with corresponding T1 postcontrast MR imaging shown in *B* and *D*. Increased FDG uptake above that of normal white matter is observed in the right cerebellar hemisphere (*A* and *B*) and right middle cerebellar peduncle (*C* and *D*), highly suspicious for recurrent tumor (*red arrows*). FDG uptake less than the blood pool is observed in an enhancing lesion in the left cerebellar hemisphere (*yellow arrowhead*), most consistent with treatment effect.

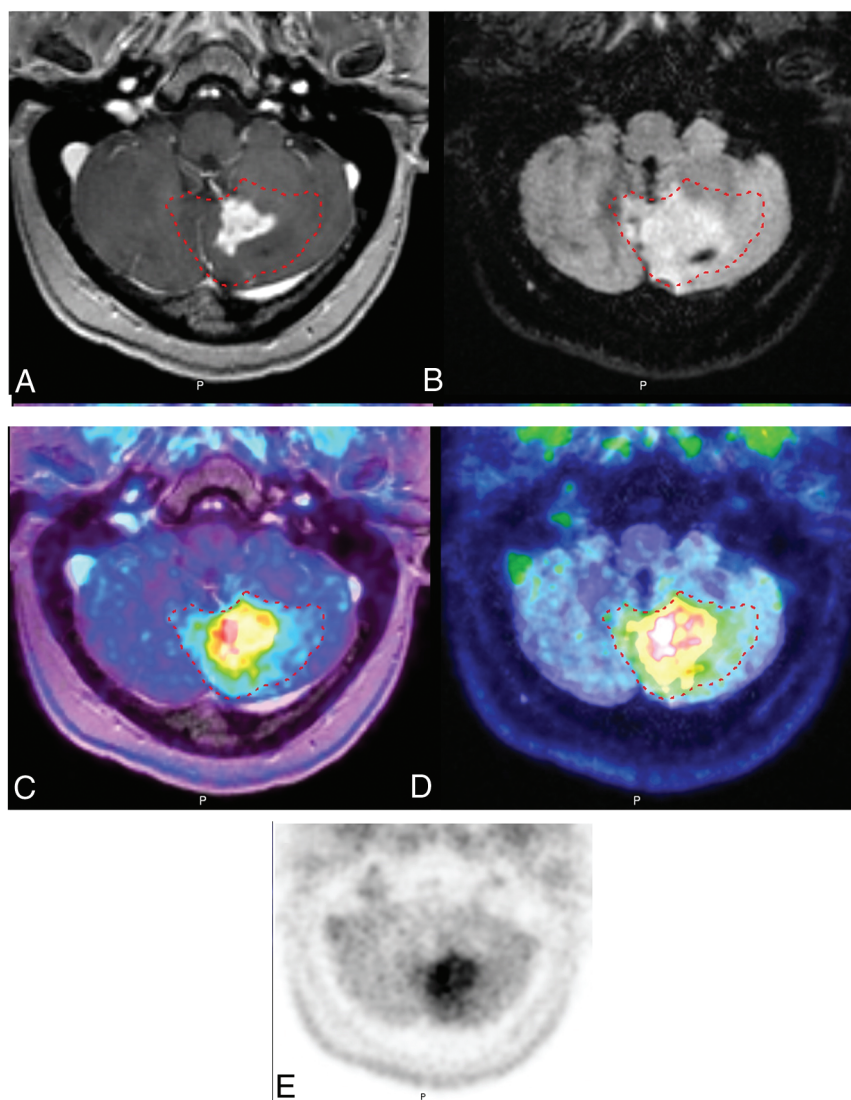

C  
O  
L  
O  
R

**SUPPLEMENTARY FIGURE 2.** Selected FET PET/MR images from a study performed in an 18-year-old woman with a new cerebellar mass after prior treatment for medulloblastoma. The mass demonstrates contrast enhancement (A) and FLAIR hyperintensity (B) with associated increased FET uptake on the corresponding fused FET PET/MR images (C and D, respectively) and the PET-only image (E). Note that the tumor volume defined by FET (*dashed red line*) using a 1.6 tumor-to-normal brain ratio threshold is larger than the enhancing portion of the mass (A and C) and similar to but not identical to the FLAIR hyperintensity (B and D). After resection, this mass was subsequently shown to be a glioblastoma.

COLOR

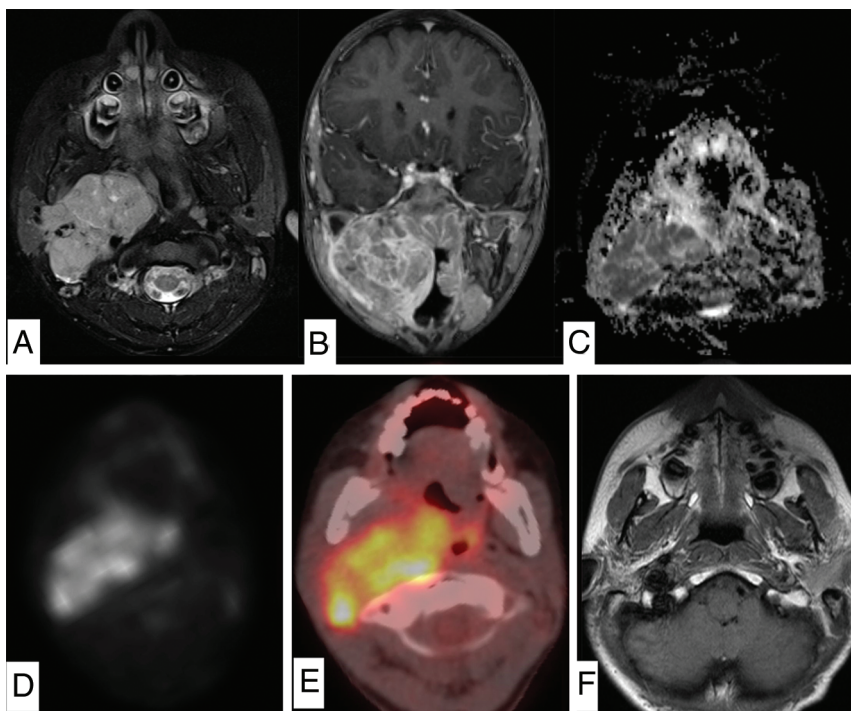

**SUPPLEMENTARY FIGURE 3.** Alveolar rhabdomyosarcoma in a 7-year-old child. A right parapharyngeal mass involves the carotid space, right parotid gland, and extends into the right pterygoid muscles (A) and demonstrates heterogeneous enhancement (B) and reduced diffusion (C and D). The mass demonstrates heterogeneous hypermetabolic activity on FDG PET, with an SUVmax of 7.0 (E). Following treatment with an operation and chemoradiotherapy, there is complete resolution of the lesion (F).

COLOR

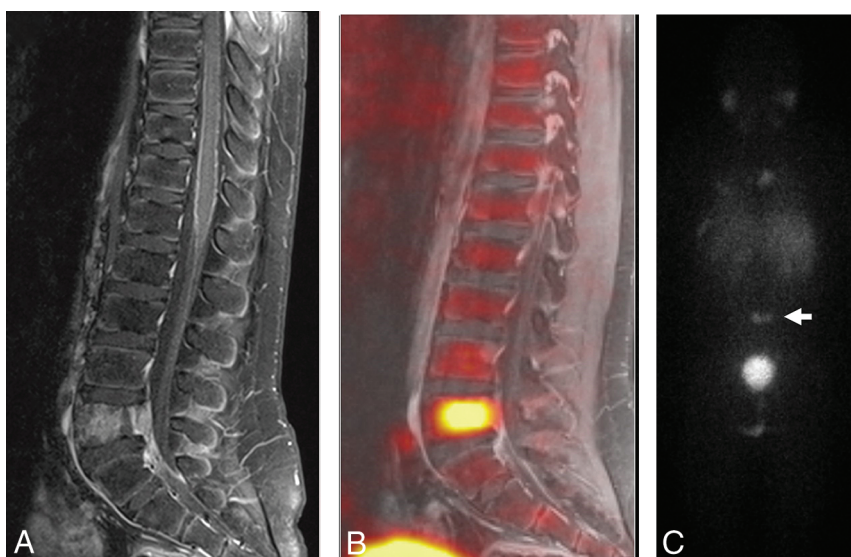

**SUPPLEMENTARY FIGURE 4.** A 7-year-old child with neuroblastoma metastatic to the lumbar spine. Postcontrast T1-weighted image (A) demonstrates an enhancing lesion in the L5 vertebral body, with associated avid FDG uptake on sagittal fused [ $^{18}\text{F}$ ] FDG PET/MR imaging (B). This osseous metastasis also demonstrates prominent uptake of MIBG on the  $^{123}\text{I}$  MIBG planar scan (C).

AQ: I



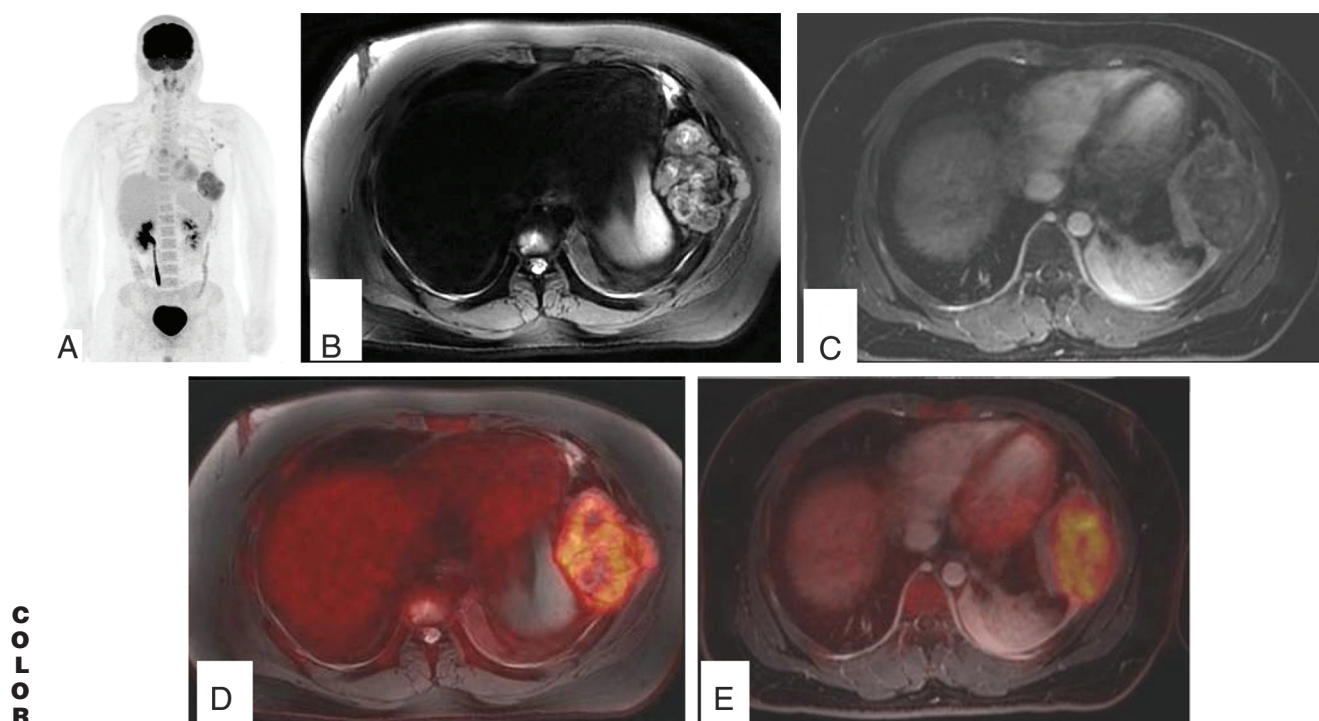

**SUPPLEMENTARY FIGURE 5.** A 16-year-old boy with an Askin tumor (Ewing Sarcoma Family type). MIP images from whole-body PET/MR imaging (A) demonstrate an FDG-avid left chest wall mass with adenopathy in the left axilla, left hilum, and mediastinum. Axial fat-suppressed post-contrast T1 (B and C) and axial fused FDG PET/MR images through the lesion (D and E) demonstrate heterogeneous internal architecture with accompanying hypermetabolic activity on FDG PET.

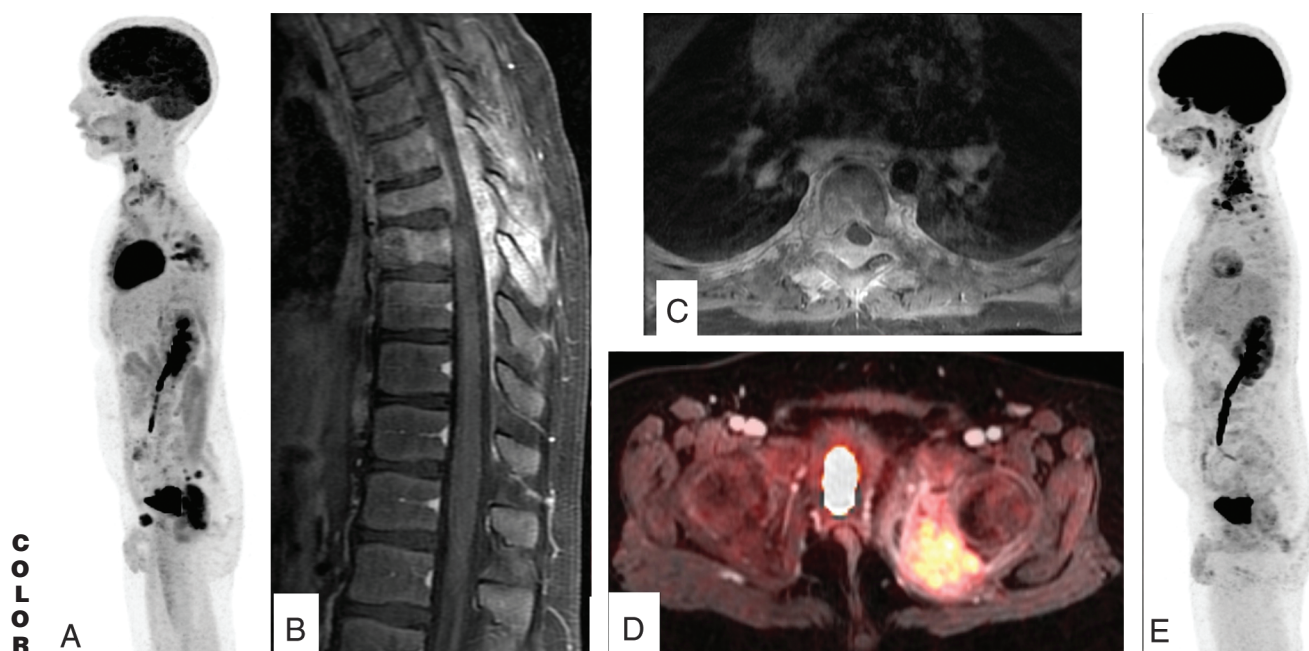

**SUPPLEMENTARY FIGURE 6.** An 11-year-old boy with bone marrow biopsy-proved Hodgkin Lymphoma. Hypermetabolic activity is seen in the thoracic spine and bony pelvis on the MIP FDG PET image (A). Sagittal and axial contrast-enhanced fat-suppressed T1 images (B and C) show partial vertebral body collapse in several adjacent midthoracic vertebrae and an enhancing component in the posterior epidural space and posterior elements at these levels. A left bony pelvic lesion was hypermetabolic on FDG PET (D), with enhancement on MR imaging (not shown). FDG PET after treatment shows an excellent response with near-complete resolution of disease (E). Notice FDG-avid brown fat uptake in the neck.



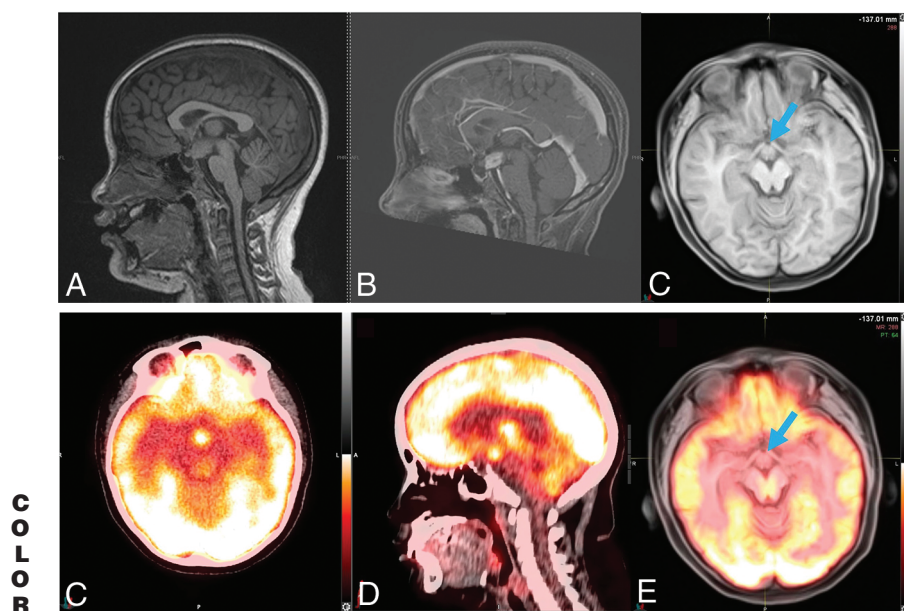

**SUPPLEMENTARY FIGURE 7.** A 9-year-old girl with intracranial LCH and no evidence of multi-system disease. Initial MR imaging of the brain demonstrates an enhancing suprasellar lesion (A and B, sagittal T1 pre- and postcontrast). There was corresponding avid FDG uptake associated with the lesion, SUVmax = 7.5 (C and D, axial and sagittal FDG PET/CT). The remainder of the whole-body PET had negative findings. The patient underwent therapy per the 2009 LCH guidelines with vinblastine and steroids. Follow-up whole-body FDG PET/MR imaging 4 months later demonstrates an interval decrease in the size and avidity of the lesion, with mild residual FDG uptake in the lesion, SUVmax = 5.1 (E and F, axial T1 and fused FDG PET/MR imaging).

AQ: J
